# Supplementary material
Source: MDPI journal article supplement (https://www.mdpi.com/2673-706X/4/1/6)
Supplement: s1 [file s1]

# Metal-Free, Bio-Triboelectric Nanogenerator Based on a Single Electrode of Bacterial Cellulose Modified with Carbon Black

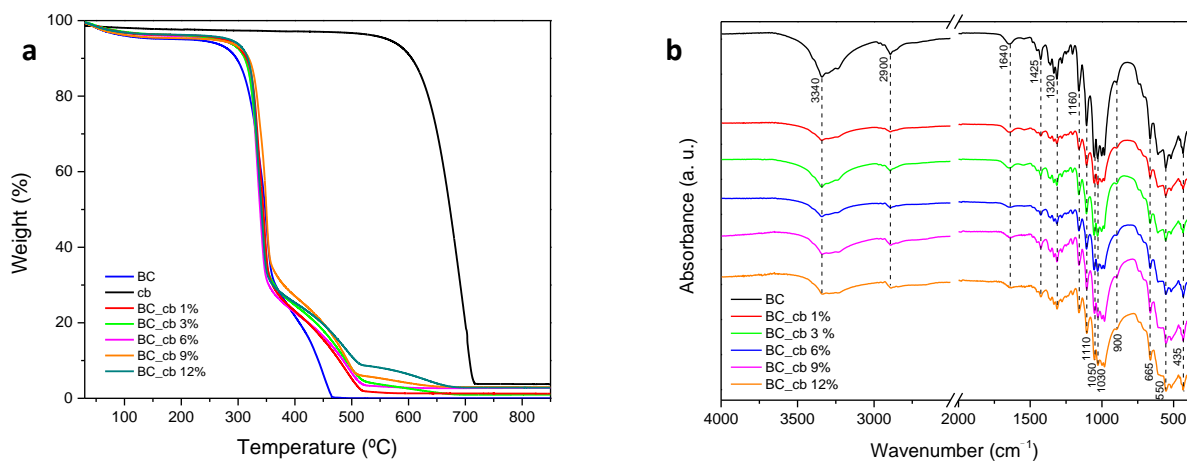

**Figure S1.** (a) TGA curves and (b) FTIR spectrum for pristine BC and BC/carbon black with relative carbon black content of 1, 3, 6, 9, and 12 wt%.

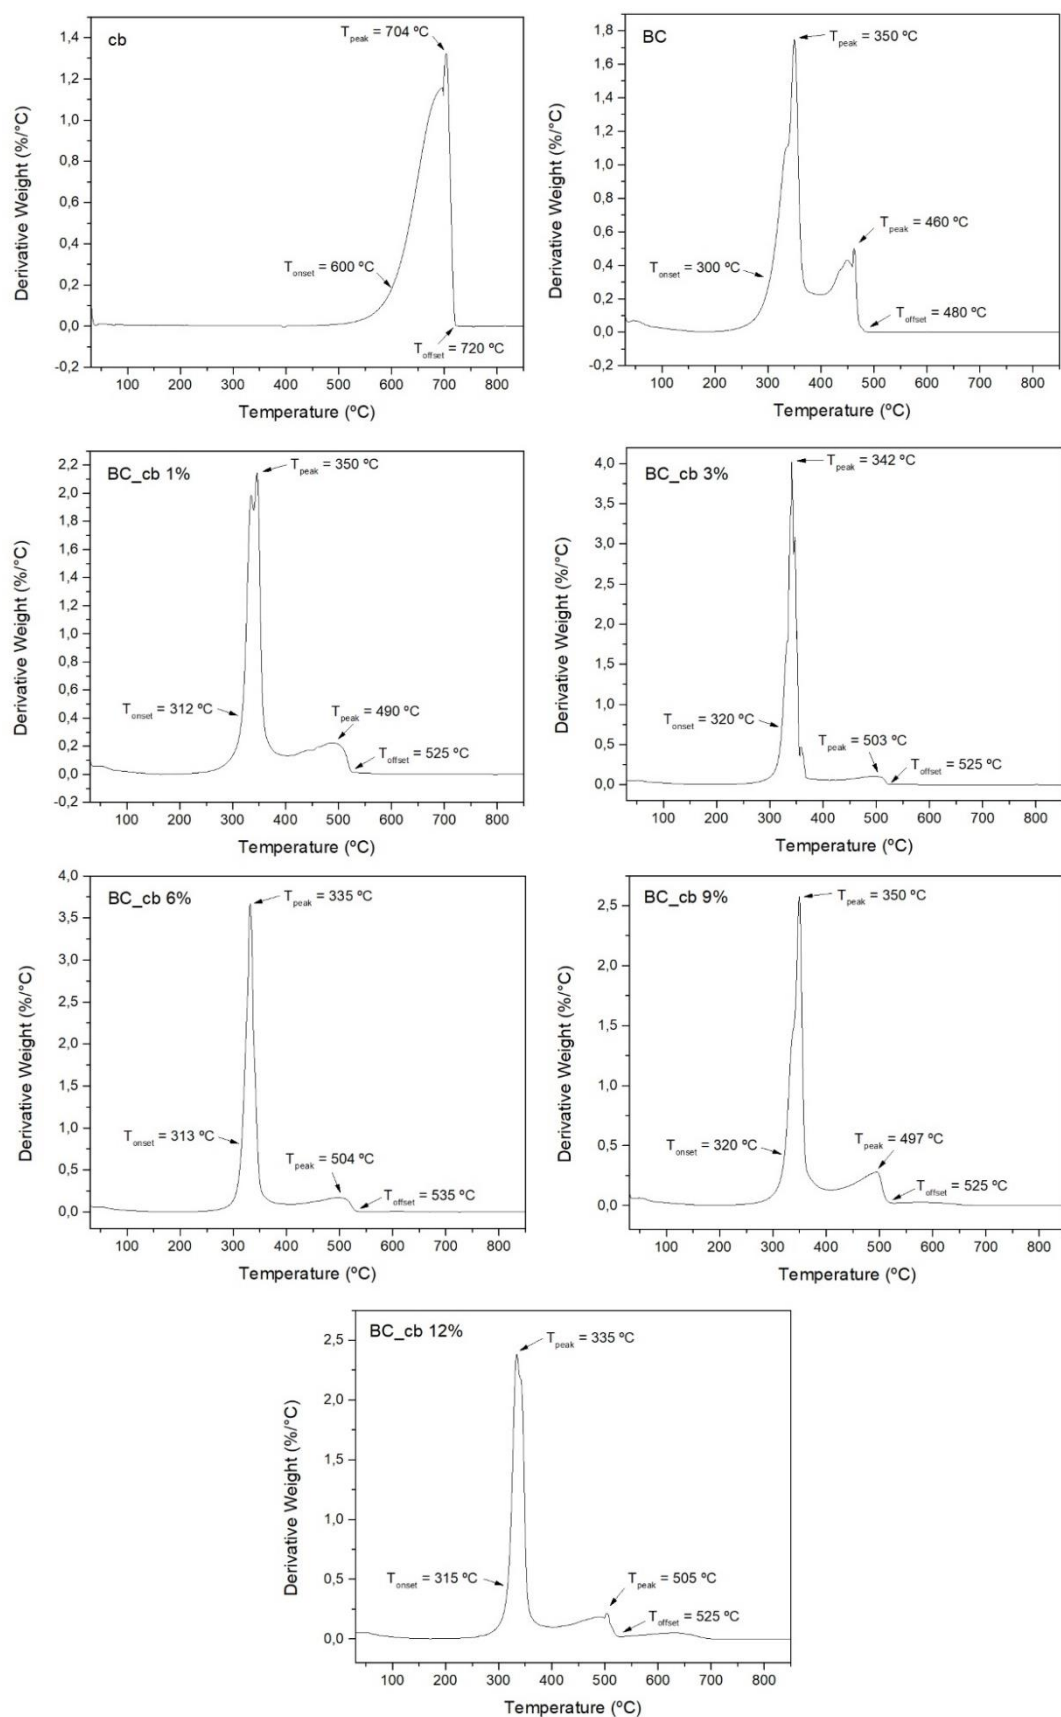

**Figure S2.** DTG curves of pristine BC and at increasing concentrations of conductive filler (carbon black) BC – 1 wt%, BC – 3 wt%, BC – 6 wt%, BC – 9 wt%, and BC – 12 wt%.

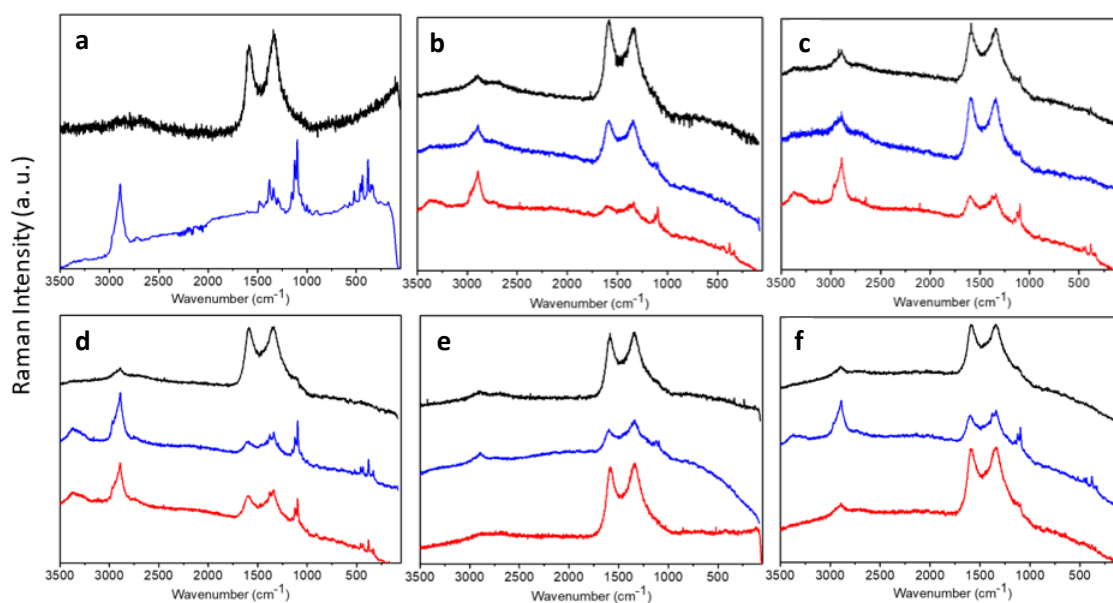

**Figure S3.** Raman spectra (a) Carbon black (black), BC (blue), (b) BC\_cb 1%, (c) BC\_cb 3%, (d) BC\_cb 6%, (e) BC\_cb 9% and BC\_cb 12%. (b) to (f) at three different positions over the sample surface.

**Table S1.** Intensity ratio between carbon D and G bands.

| Material                 | I <sub>D</sub> | I <sub>G</sub> | Intensity ratio<br>(I <sub>D</sub> /I <sub>G</sub> ) |
|--------------------------|----------------|----------------|------------------------------------------------------|
| <b>Carbon black</b>      | 57             | 51             | 1.118                                                |
| <b>BC_cb 1% point 1</b>  | 198            | 194            | 1.021                                                |
| <b>BC_cb 1% point 2</b>  | 189            | 164            | 1.152                                                |
| <b>BC_cb 1% point 3</b>  | 72             | 50             | 1.440                                                |
| <b>BC_cb 3% point 1</b>  | 148            | 142            | 1.042                                                |
| <b>BC_cb 3% point 2</b>  | 140            | 136            | 1.029                                                |
| <b>BC_cb 3% point 3</b>  | 122            | 97             | 1.258                                                |
| <b>BC_cb 6% point 1</b>  | 314            | 295            | 1.064                                                |
| <b>BC_cb 6% point 2</b>  | 103            | 68             | 1.515                                                |
| <b>BC_cb 6% point 3</b>  | 167            | 103            | 1.621                                                |
| <b>BC_cb 9% point 1</b>  | 179            | 172            | 1.041                                                |
| <b>BC_cb 9% point 2</b>  | 233            | 179            | 1.302                                                |
| <b>BC_cb 9% point 3</b>  | 217            | 194            | 1.119                                                |
| <b>BC_cb 12% point 1</b> | 333            | 329            | 1.012                                                |

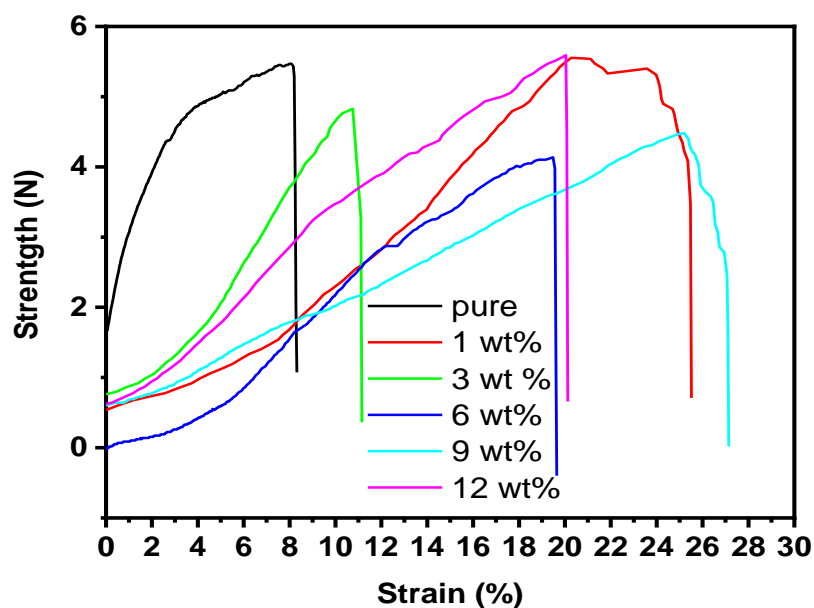

**Figure S4.** Stress-strain curves for electrodes of bacterial cellulose prepared at increasing content of carbon black

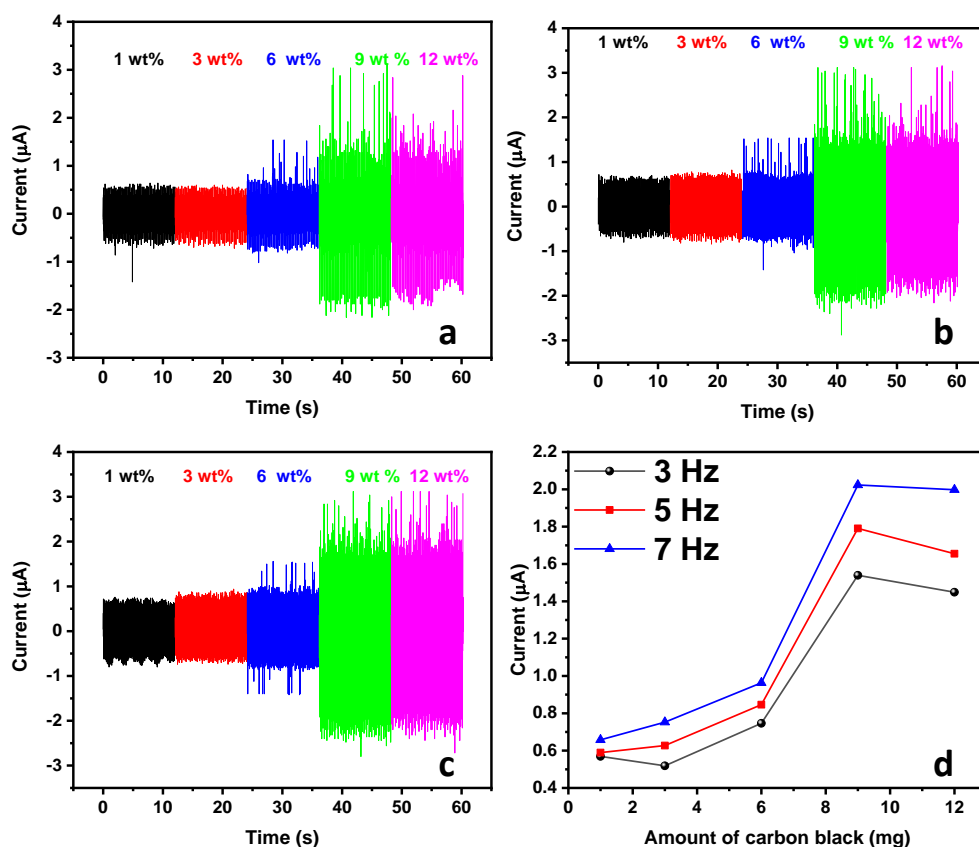

**Figure S5.** Short circuit current for bio-TENG of modified bacterial cellulose at increasing content of additive filler and excited at 3 Hz (a), 5 Hz (b), and 7 Hz (c); and the medium of peaks as a function of additive content and frequency of operation (d).

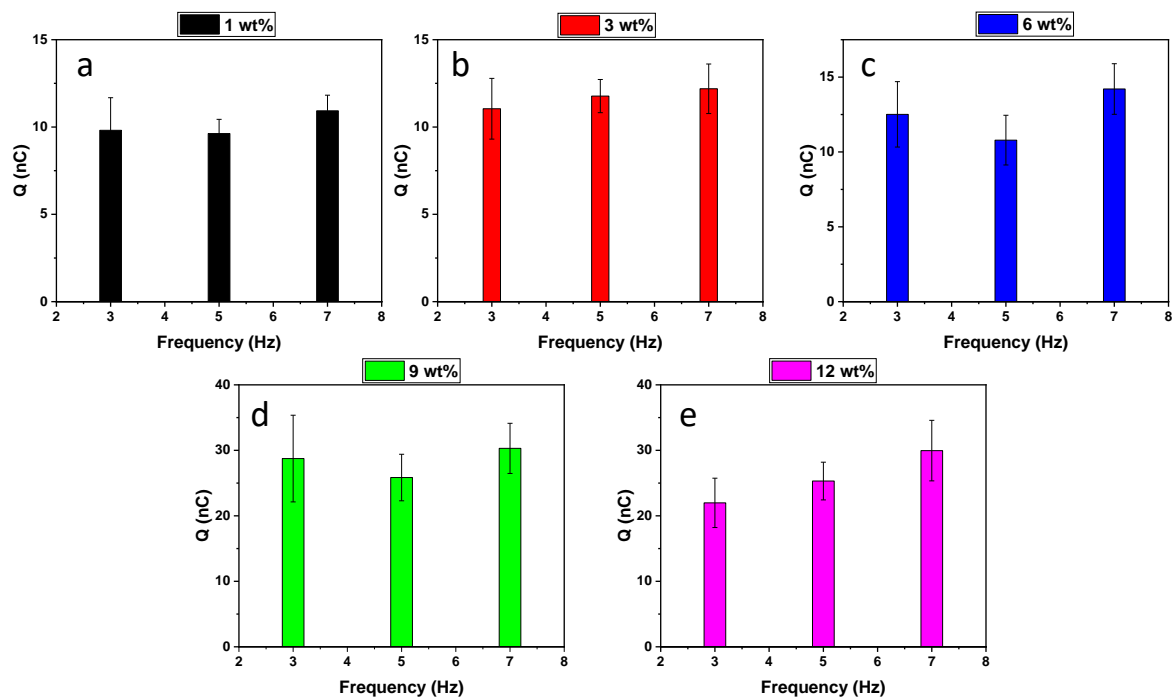

**Figure S6.** Transferred charge per cycle calculated from short circuit current of different devices ((a) 1 wt%, (b) 3 wt%, (c) 6 wt%, (d) 9 wt%, (e) 12 wt%) at different frequencies of operation.

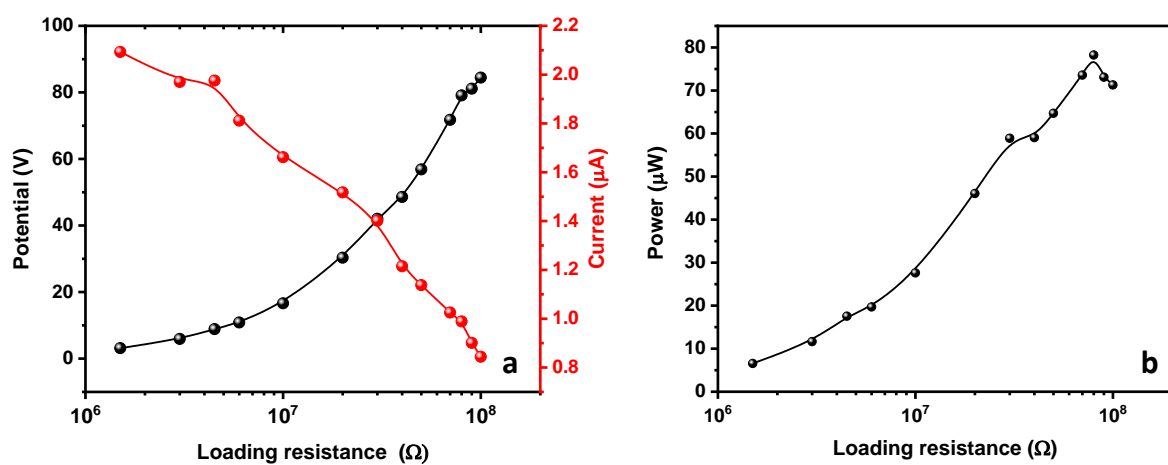

**Figure S7.** (a) Overall dependence of the voltage output and current as a function of the loading resistance, and (b) corresponding variation in the power output for the bio-TENG.
